# Supplementary material for: Transient, in situ synthesis of ultrafine ruthenium nanoparticles for a high-rate Li–CO2 battery
Source: Royal Society of Chemistry journal article supplement (doi:10.1039/c8ee03506g), 2019-01-01
Supplement: c8ee03506g1.pdf [file c8ee03506g1.pdf]

## Supporting Information

### **Transient, *in situ* Synthesis of Ultrafine Ruthenium Nanoparticles for a High-rate Li-CO<sub>2</sub> Battery**

Yun Qiao,<sup>1‡</sup> Shaomao Xu,<sup>1‡</sup> Yang Liu,<sup>1</sup> Jiaqi Dai,<sup>1</sup> Hua Xie,<sup>1</sup> Yonggang Yao,<sup>1</sup> Xiaowei Mu,<sup>2</sup>  
Chaoji Chen,<sup>1</sup> Dylan Jacob Kline,<sup>3</sup> Emily M. Hitz,<sup>1</sup> Boyang Liu,<sup>1</sup> Jianwei Song,<sup>1</sup> Ping He,<sup>2</sup>  
Michael R. Zachariah,<sup>3</sup> Liangbing Hu<sup>\*1</sup>

<sup>1</sup> Department of Materials Science and Engineering, University of Maryland, College Park, Maryland, 20742, USA.

<sup>2</sup> College of Engineering and Applied Sciences, Nanjing University, Nanjing, 210093, China.

<sup>3</sup> Department of Chemistry and Biochemistry, University of Maryland, College Park, Maryland, 20742, USA.

\* Email: [binghu@umd.edu](mailto:binghu@umd.edu)

‡ These authors contributed equally to this work.

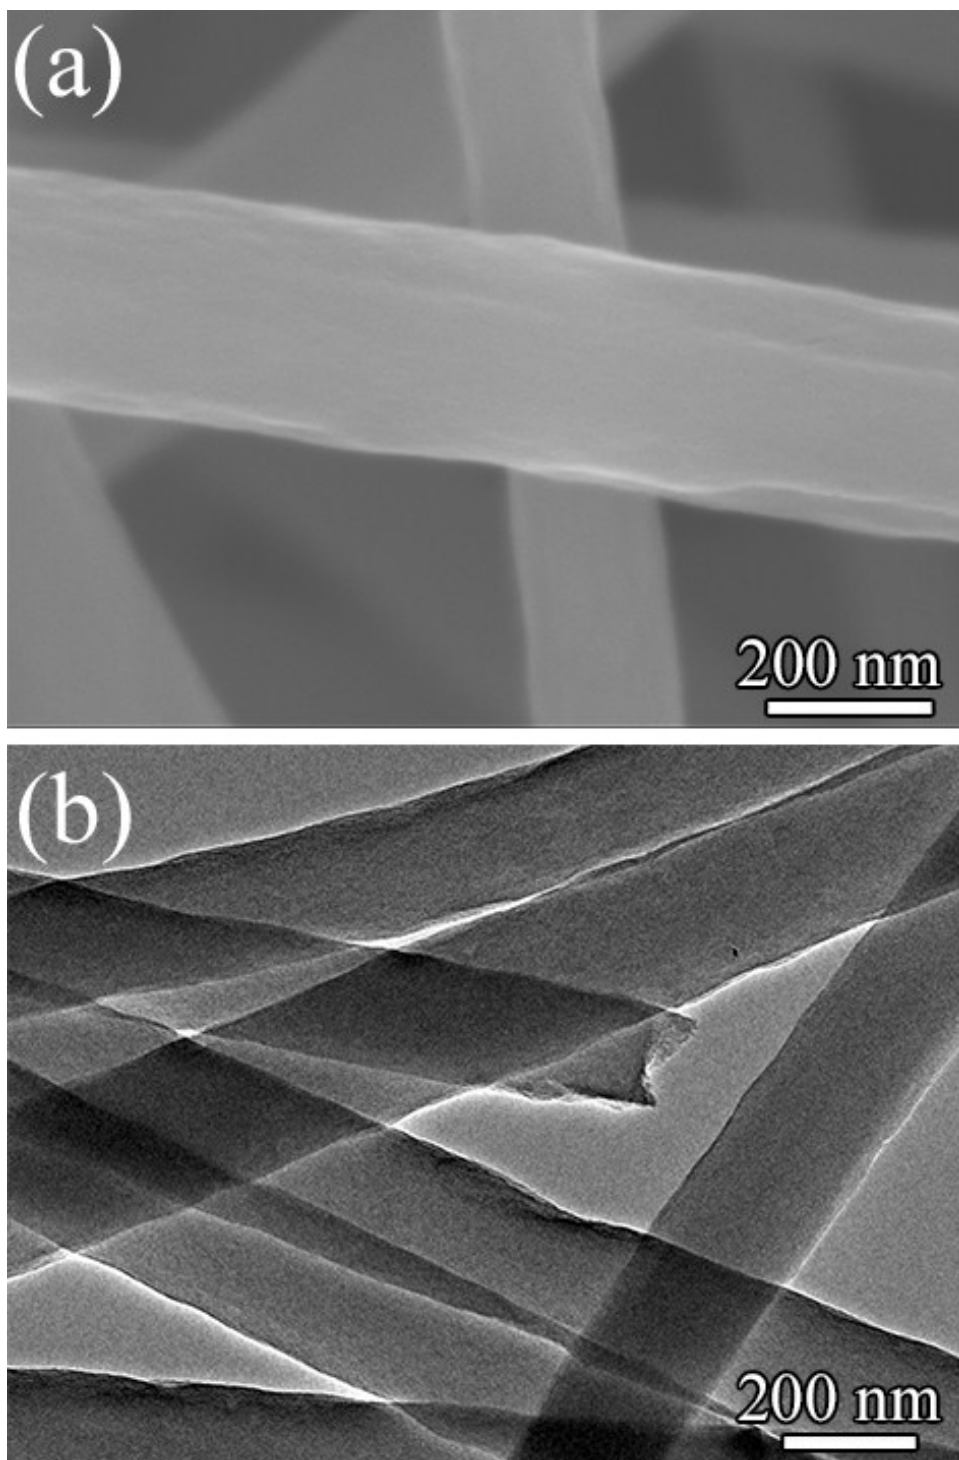

**Figure S1.** (a) SEM and (b) TEM images of pristine carbon nanofibers, showing the smooth surface without any pores or holes.

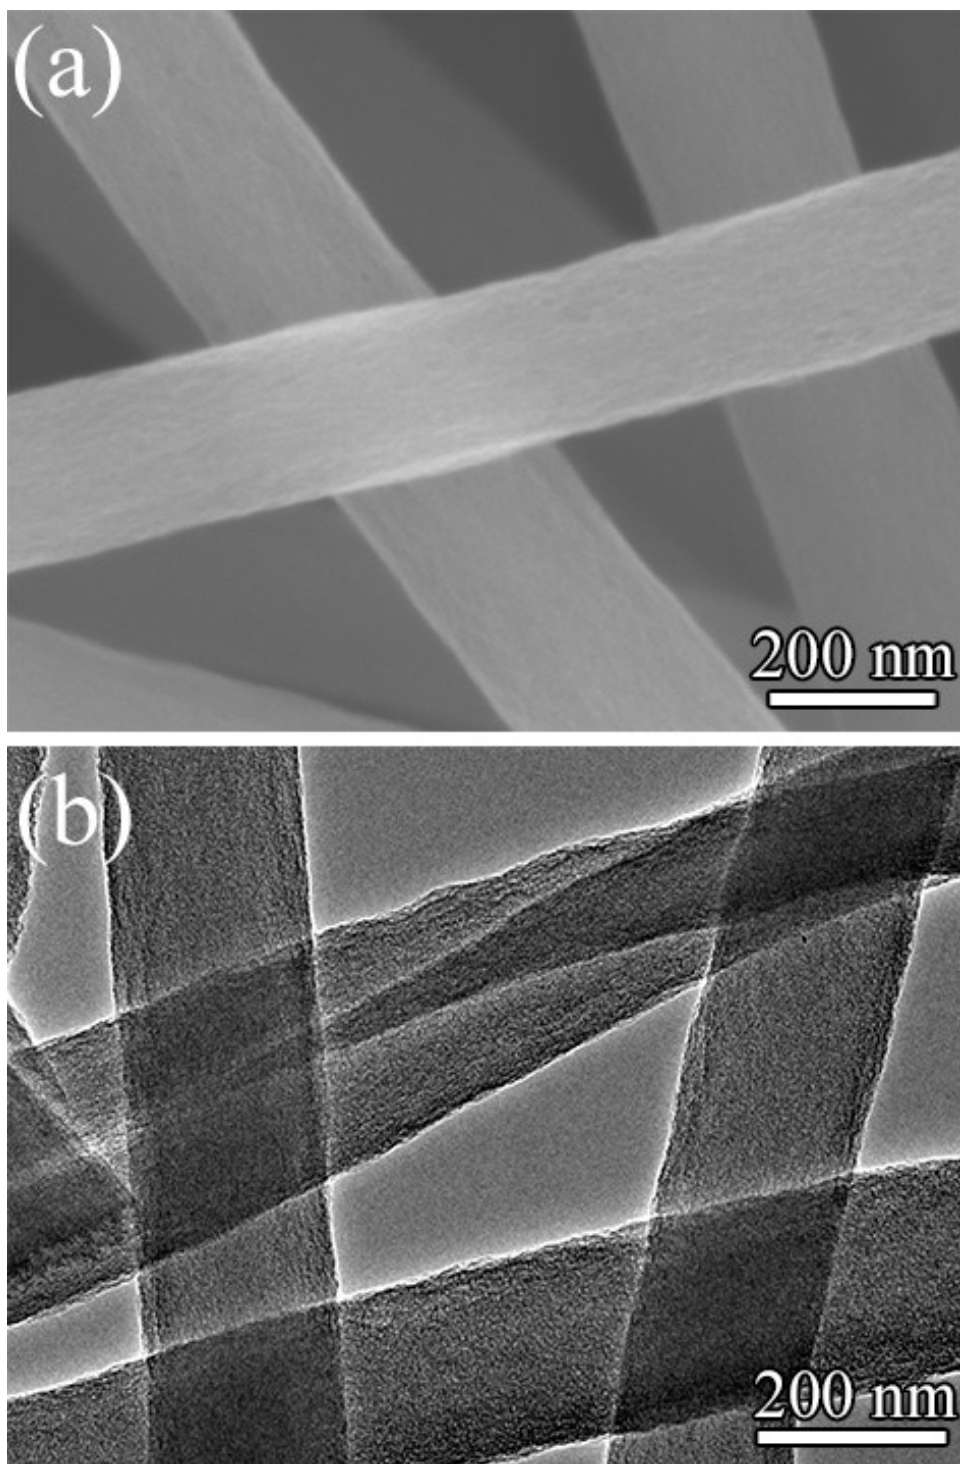

**Figure S2.** (a) SEM and (b) TEM images of the ACNFs, showing how the surface of the CNFs become rough and porous after CO<sub>2</sub> gasification.

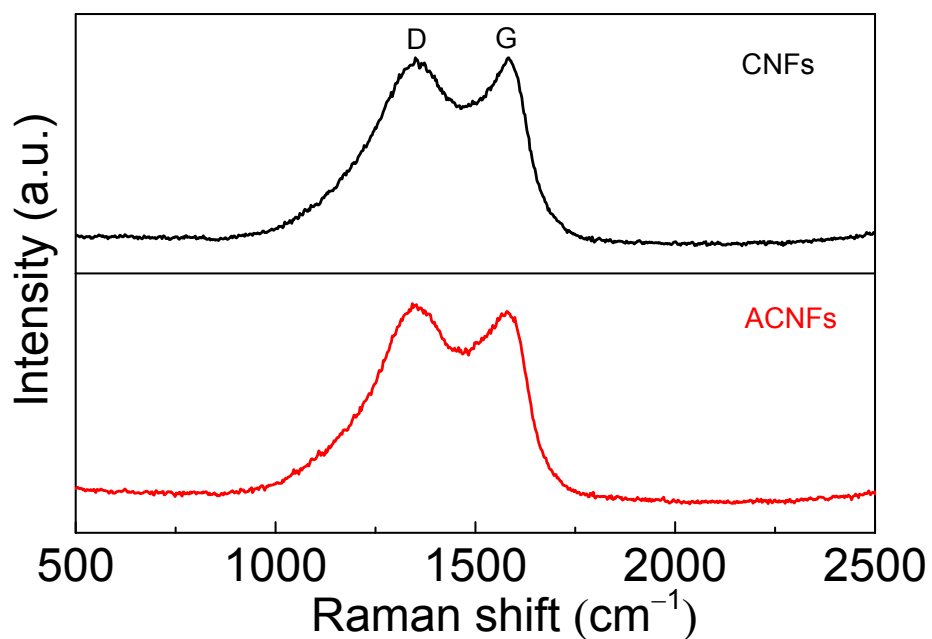

**Figure S3.** Raman spectra of CNFs and ACNFs, featuring peaks at 1353 and 1580 cm<sup>-1</sup> that correspond to the D band (disordered or defective carbon structure) and G band (graphitic sp<sup>2</sup> carbon structures), respectively. The  $I_D/I_G$  ratio increases from 0.97 (CNFs) to 1.03 (ACNFs), indicating more defective sites in ACNFs after CO<sub>2</sub> gasification compared to CNFs.

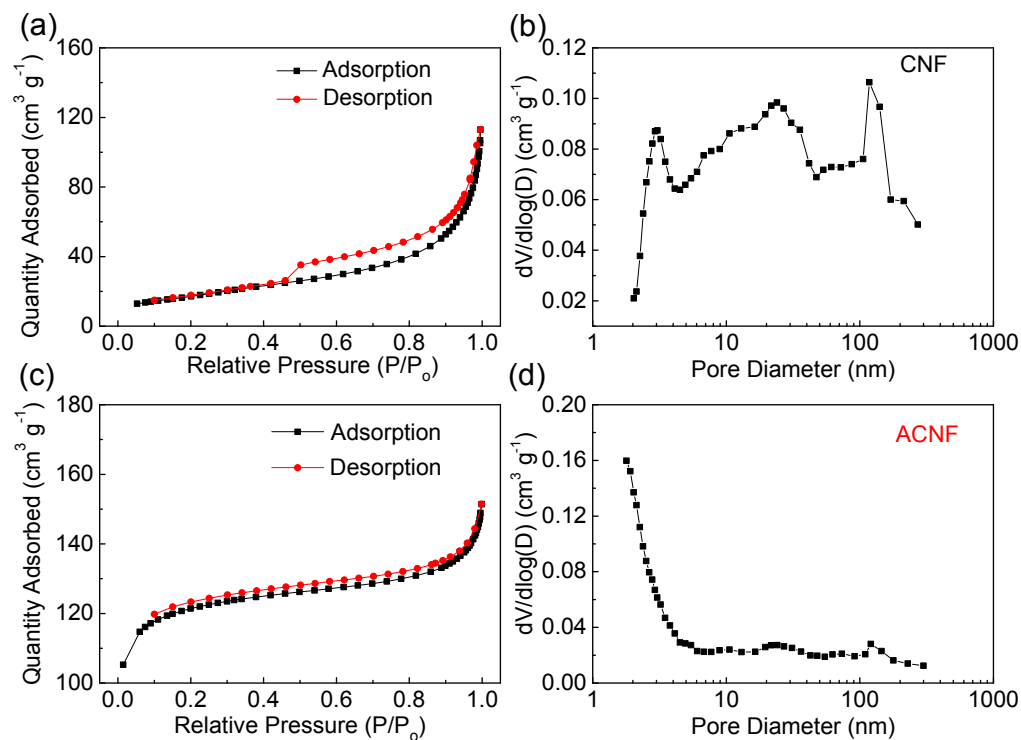

**Figure S4.** Nitrogen adsorption-desorption isotherms and pore size distribution of (a, b) CNFs and (c, d) ACNFs. The BET surface areas for the CNFs and ACNFs are  $63.18$  and  $379.91 \text{ m}^2 \text{g}^{-1}$ , while the t-Plot micropore volumes are  $3.85 \times 10^{-3}$  and  $136.74 \times 10^{-3} \text{ cm}^3 \text{g}^{-1}$ , respectively. These results demonstrate that the surface area and pore volume for the ACNFs are enhanced after  $\text{CO}_2$  activation, which could provide more adsorption sites for the ruthenium salt and deposition sites for ultrafine Ru nanoparticles, not only on the surface but also inside the ACNFs.

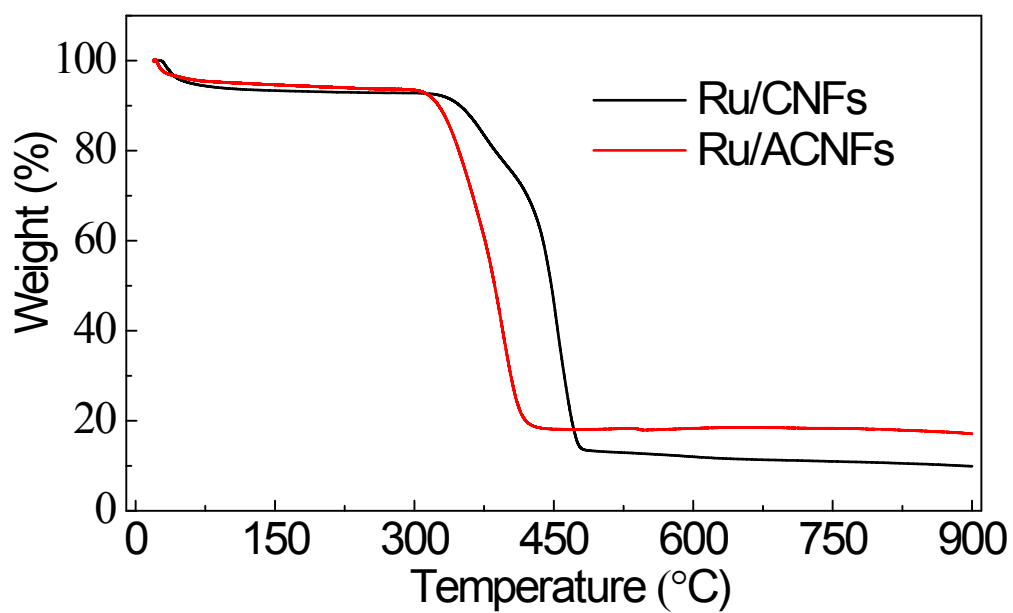

**Figure S5.** TGA curves of the Ru/CNFs and Ru/ACNFs from room temperature to 900 °C at a heating rate of 10 °C min<sup>-1</sup> in air atmosphere.

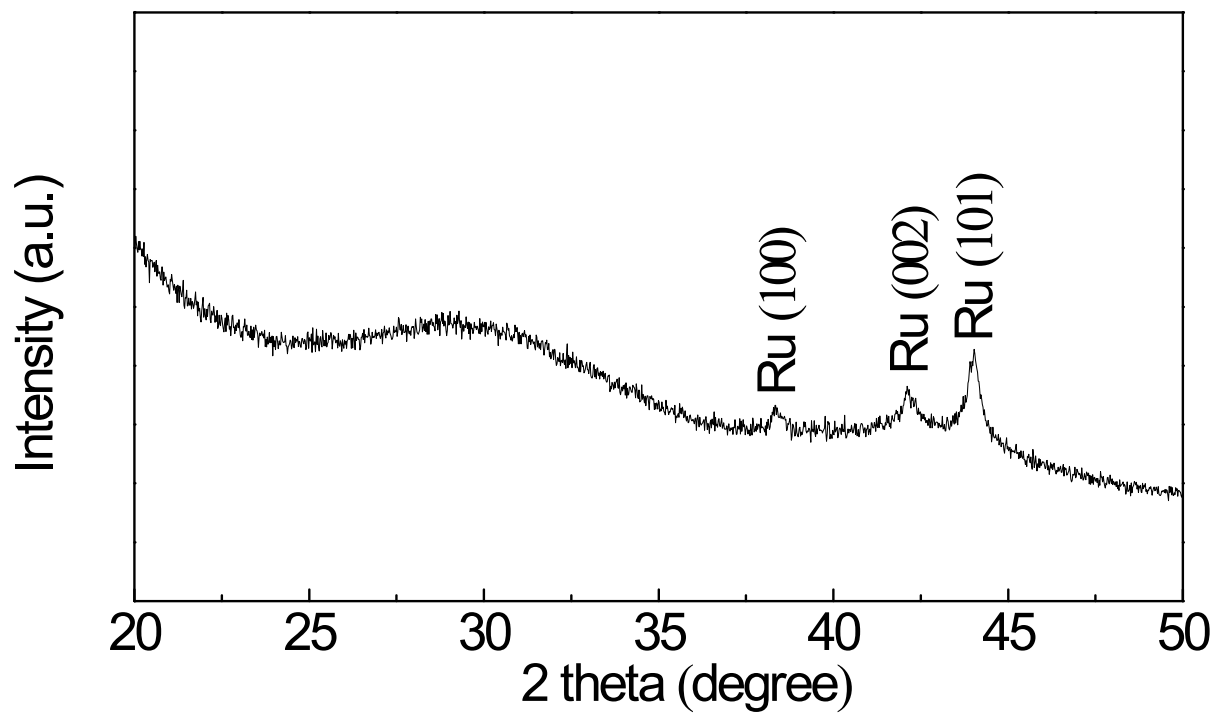

**Figure S6.** XRD pattern of the Ru/ACNFs electrode, which demonstrates the Ru nanoparticles are successfully anchored on the activated CNFs.

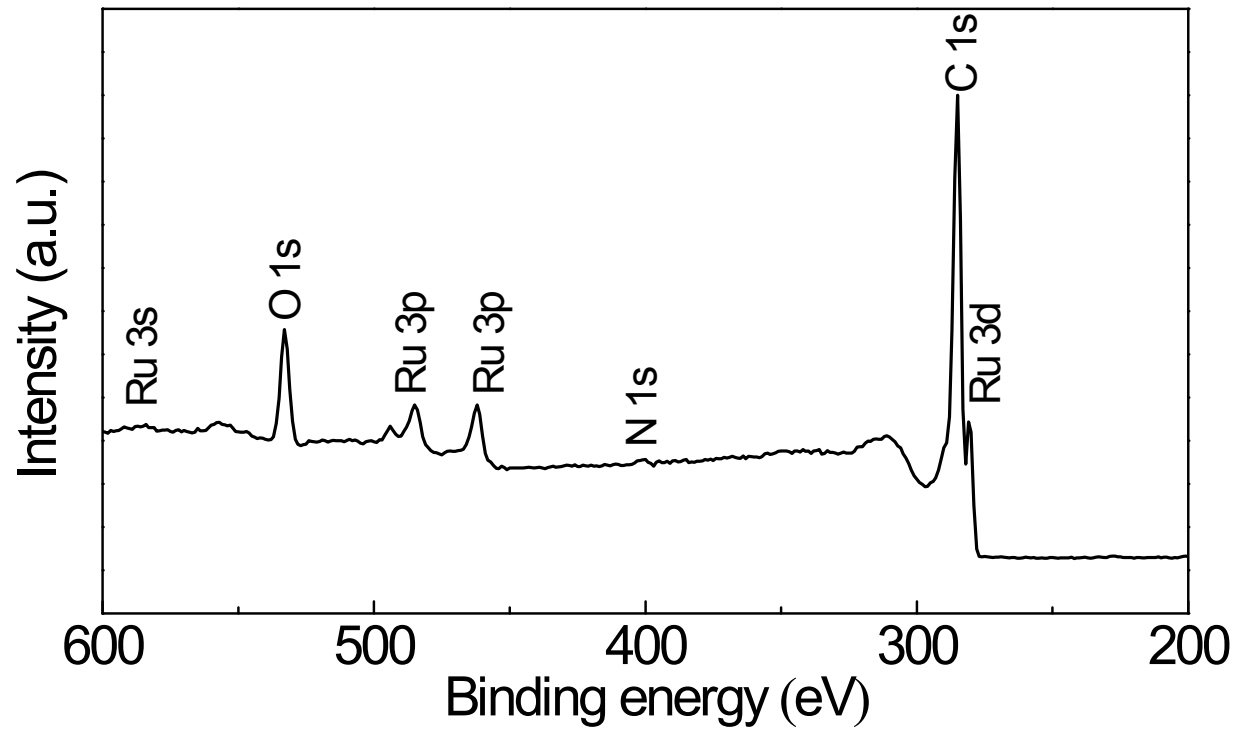

**Figure S7.** XPS spectrum of the Ru/ACNF cathode, further certifying it is composed of C, Ru, N, and O.



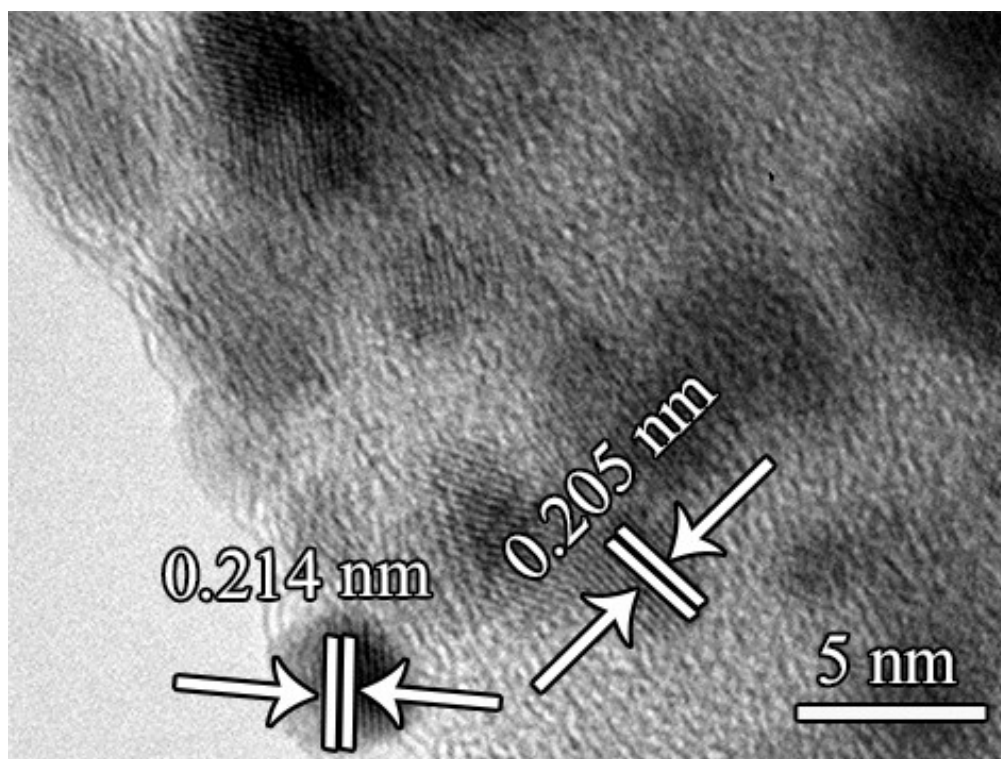

**Figure S8.** High resolution TEM image of the Ru/ACNF electrode.

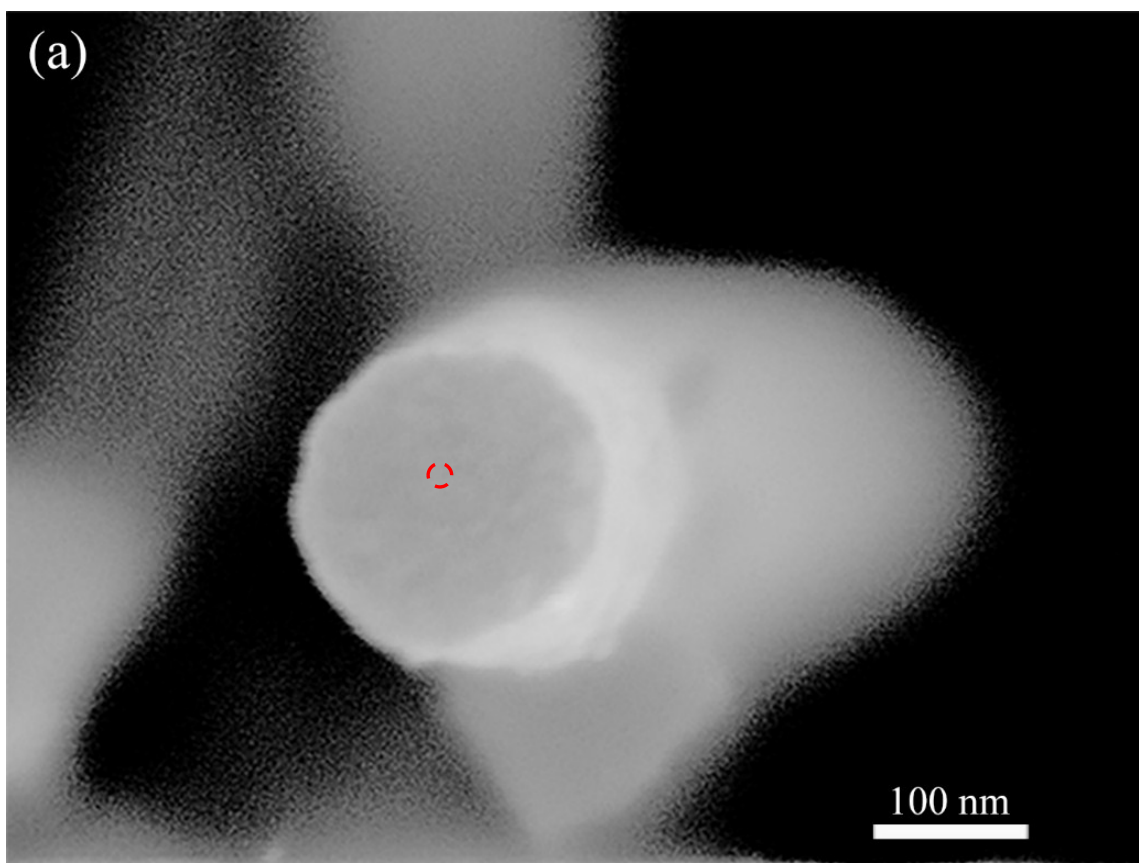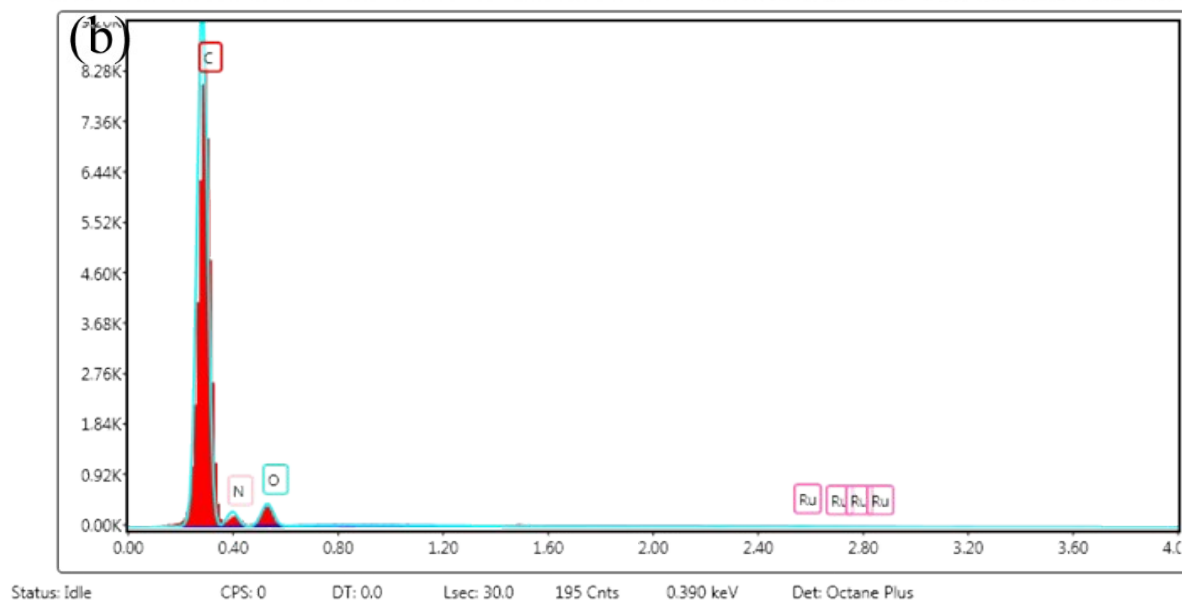

**Figure S9.** (a) Cross-sectional SEM image and (b) the corresponding EDX spectrum of the Ru/CNF electrode, indicating that the Ru nanoparticles are not deposited on the interior of the fibers.

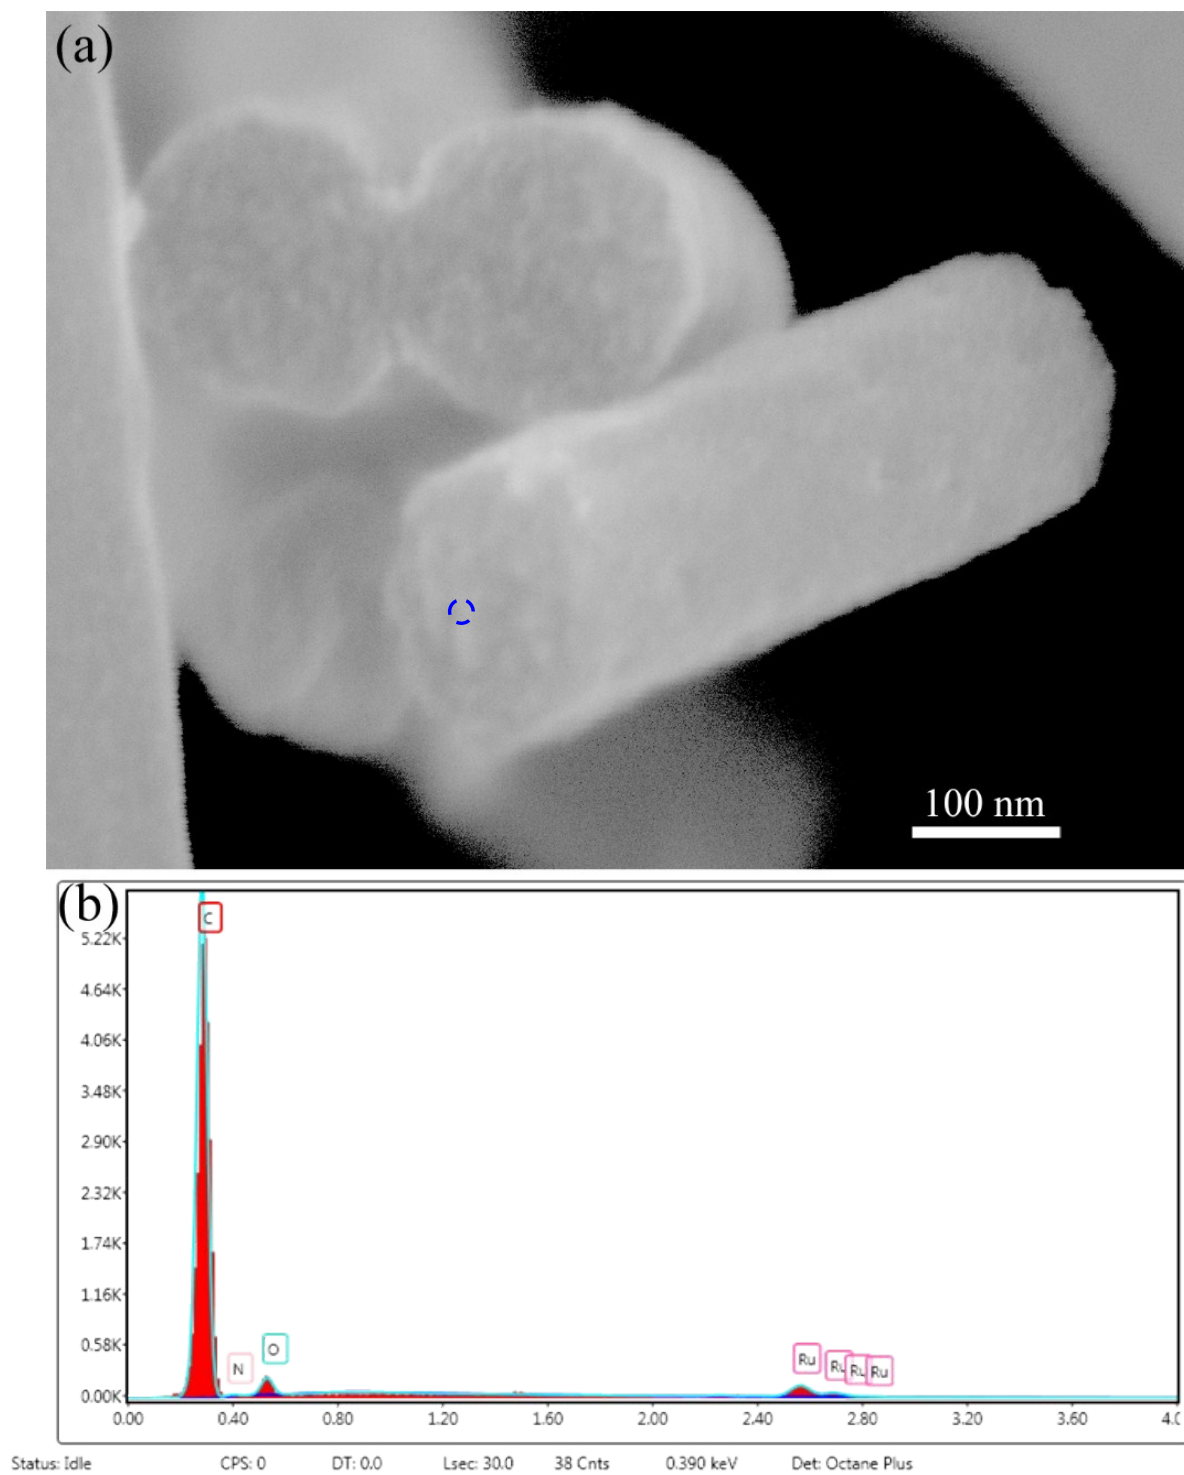

**Figure S10.** (a) Cross-sectional SEM image and (b) the corresponding EDX spectrum of the Ru/ACNF electrode, confirming that Ru nanoparticles can be successfully deposited not only on the surface of the fibers but also within their interior.

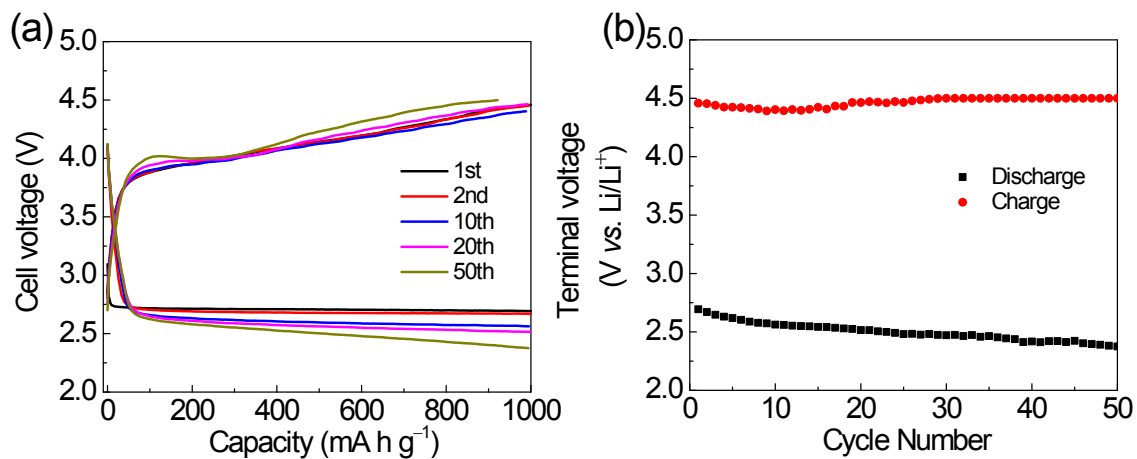

**Figure S11.** The electrochemical performance of the ACNF cathode at a current density of  $0.1 \text{ A g}^{-1}$  in a Li- $\text{CO}_2$  battery. (a) Charge/discharge curves of the ACNF cathode at the 1<sup>st</sup>, 2<sup>nd</sup>, 10<sup>th</sup>, 20<sup>th</sup>, and 50<sup>th</sup> cycles with a limiting capacity of  $1000 \text{ mA h g}^{-1}$ . (b) The corresponding discharge and charge terminal voltages upon cycling.

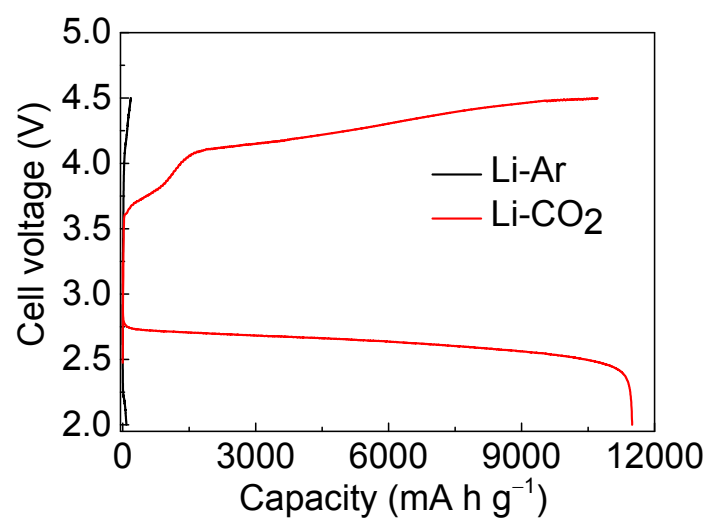

**Figure S12.** Full charge and discharge profiles of the Ru/ACNF cathode at a current density of 200 mA g<sup>-1</sup> in Li-Ar and Li-CO<sub>2</sub> batteries.

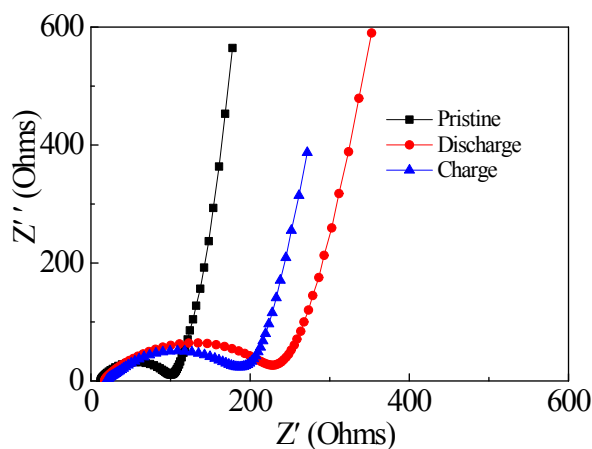

**Figure S13.** The electrochemical impedance spectra for the initial and cycled Ru/ACNF cathode.

The Nyquist plots at different states are almost the same, demonstrating a depressed semicircle in the high-middle frequency region and an oblique straight line in the low frequency range. These plots with small semicircles suggest a low resistance of  $\sim 100\ \Omega$ , which can be attributed to the fact that the Ru/ACNF electrode possesses low electrical contact and charge-transfer resistances. Meanwhile, large Warburg diffusion tails imply the electrode possesses excellent ion mobility performance. After fully discharging, the electrode shows an elevated resistance ( $240\ \Omega$ ) due to the formation of non-conductive  $\text{Li}_2\text{CO}_3$  on the surface of the electrode. It is worth noting that the semicircle diameter becomes smaller after the device fully recharges ( $180\ \Omega$ ) due to the decomposition of  $\text{Li}_2\text{CO}_3$  under the presence of the Ru catalyst. These results reveal that the Ru/CNF electrode features high electrical conductivity and catalytic activity, as well as a porous structure, making it a favorable candidate for capturing  $\text{CO}_2$  and enabling the development of commercially viable, rechargeable energy-storage devices.

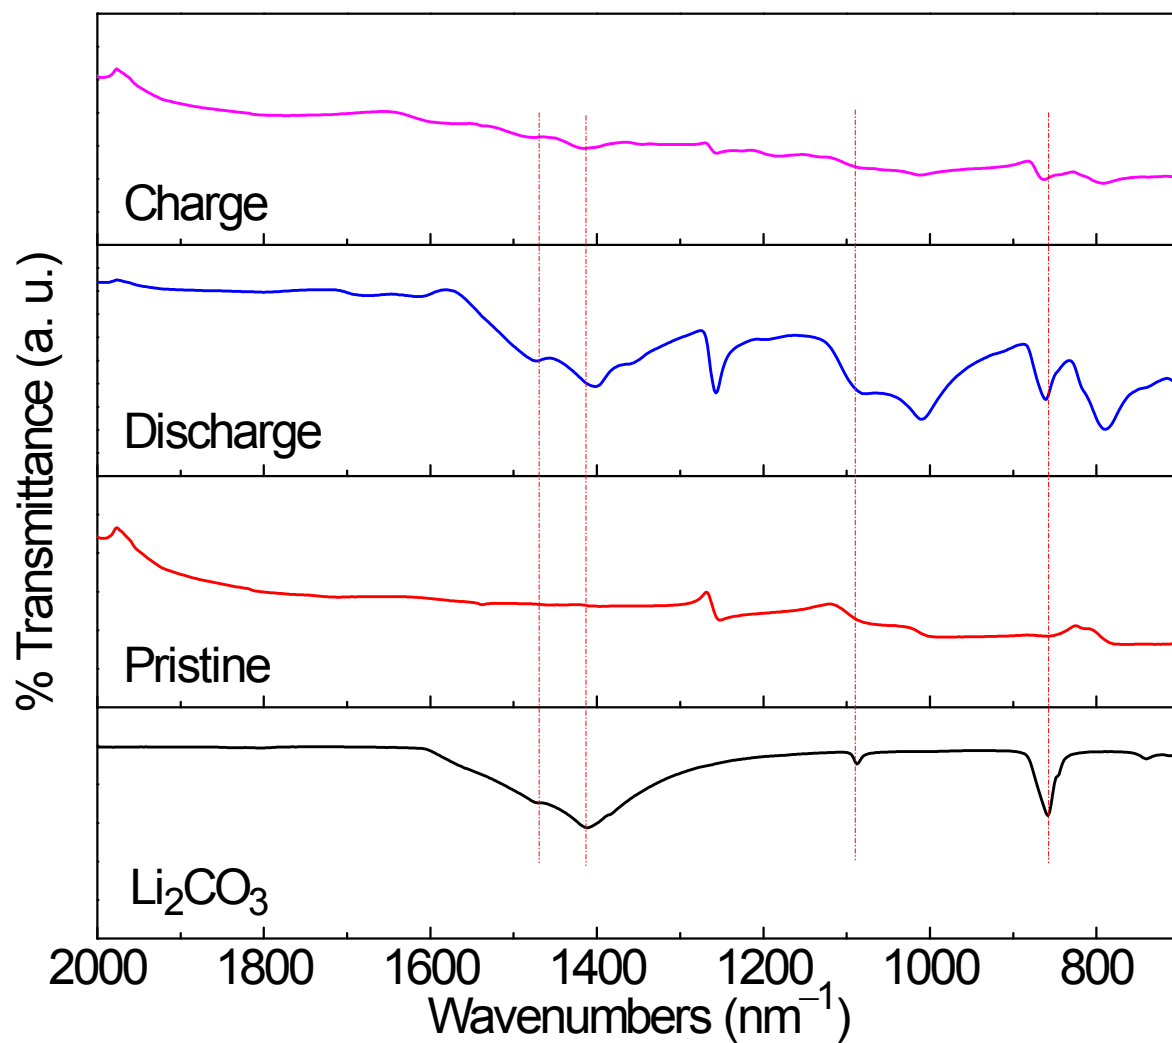

**Figure S14.** FTIR spectra of Li<sub>2</sub>CO<sub>3</sub>, the pristine Ru/ACNF electrode, the cycled electrode after discharge and recharge, to prove the deposition of Li<sub>2</sub>CO<sub>3</sub> in the discharge process and its decomposition after recharge.
